# Supplementary material
Source: PubMed Central journal article supplement (PMC2683045)
Supplement: emboj200963s1.pdf [file emboj200963s1.pdf]

## SUPPLEMENTARY INFORMATION

### The Structure of the Integrin $\alpha$ IIb $\beta$ 3 Transmembrane Complex Explains

### Integrin Transmembrane Signaling

Tong-Lay Lau<sup>1</sup>, Chungho Kim<sup>2</sup>, Mark H. Ginsberg<sup>2</sup> and Tobias S. Ulmer<sup>1</sup>

<sup>1</sup>Department of Biochemistry & Molecular Biology and Zilkha Neurogenetic Institute, Keck School of Medicine, University of Southern California, 1501 San Pablo Street, Los Angeles, CA 90033

<sup>2</sup>Department of Medicine, University of California San Diego, 9500 Gilman Drive, La Jolla, CA 92093

#### TABLE OF CONTENTS

|                                                                                                            |   |
|------------------------------------------------------------------------------------------------------------|---|
| <b>Supplementary Figure 1.</b> H-N correlation spectra of free TM segments                                 | 2 |
| <b>Supplementary Figure 2.</b> Effect of $\alpha$ IIb(R995A) peptide upon heterodimerization               | 3 |
| <b>Supplementary Figure 3.</b> Chemical shift-based backbone torsion angle predictions                     | 4 |
| <b>Supplementary Figure 4.</b> Illustration of intersubunit $\alpha$ IIb- $\beta$ 3 NOEs                   | 5 |
| <b>Supplementary Figure 5.</b> Flow cytometric activation assays of selected point mutations               | 6 |
| <b>Supplementary Table I.</b> Restraints comparison with monomeric $\alpha$ IIb/ $\beta$ 3 structures      | 7 |
| <b>Supplementary Table II.</b> Structural statistics for the $\alpha$ IIb- $\beta$ 3 transmembrane complex | 8 |

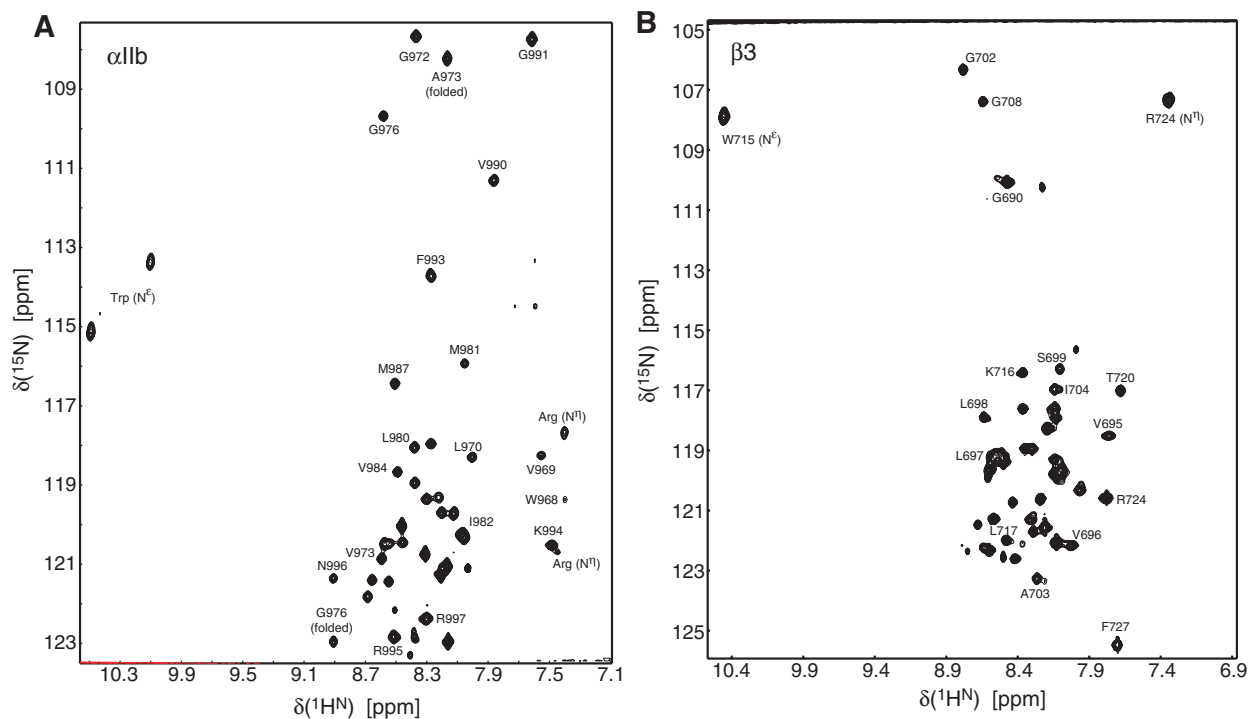

**Supplementary Figure 1. H-N correlation spectra of free, monomeric  $\alpha$ IIb and  $\beta$ 3 TM segments.**

Well-resolved H-N resonances are labeled. Note that monomeric and heterodimeric  $\alpha$ IIb spectra were recorded with slightly different  $^{15}\text{N}$  spectral width to optimize data acquisition. Samples were prepared using bicelles composed of 385 mM 1,2-Dihexanoyl-*sn*-Glycero-3-Phosphocholine, 83 mM 1-Palmitoyl-2-Oleoyl-*sn*-Glycero-3-Phosphocholine, 41 mM 1-Palmitoyl-2-Oleoyl-*sn*-Glycero-3-[Phospho-L-Serine].

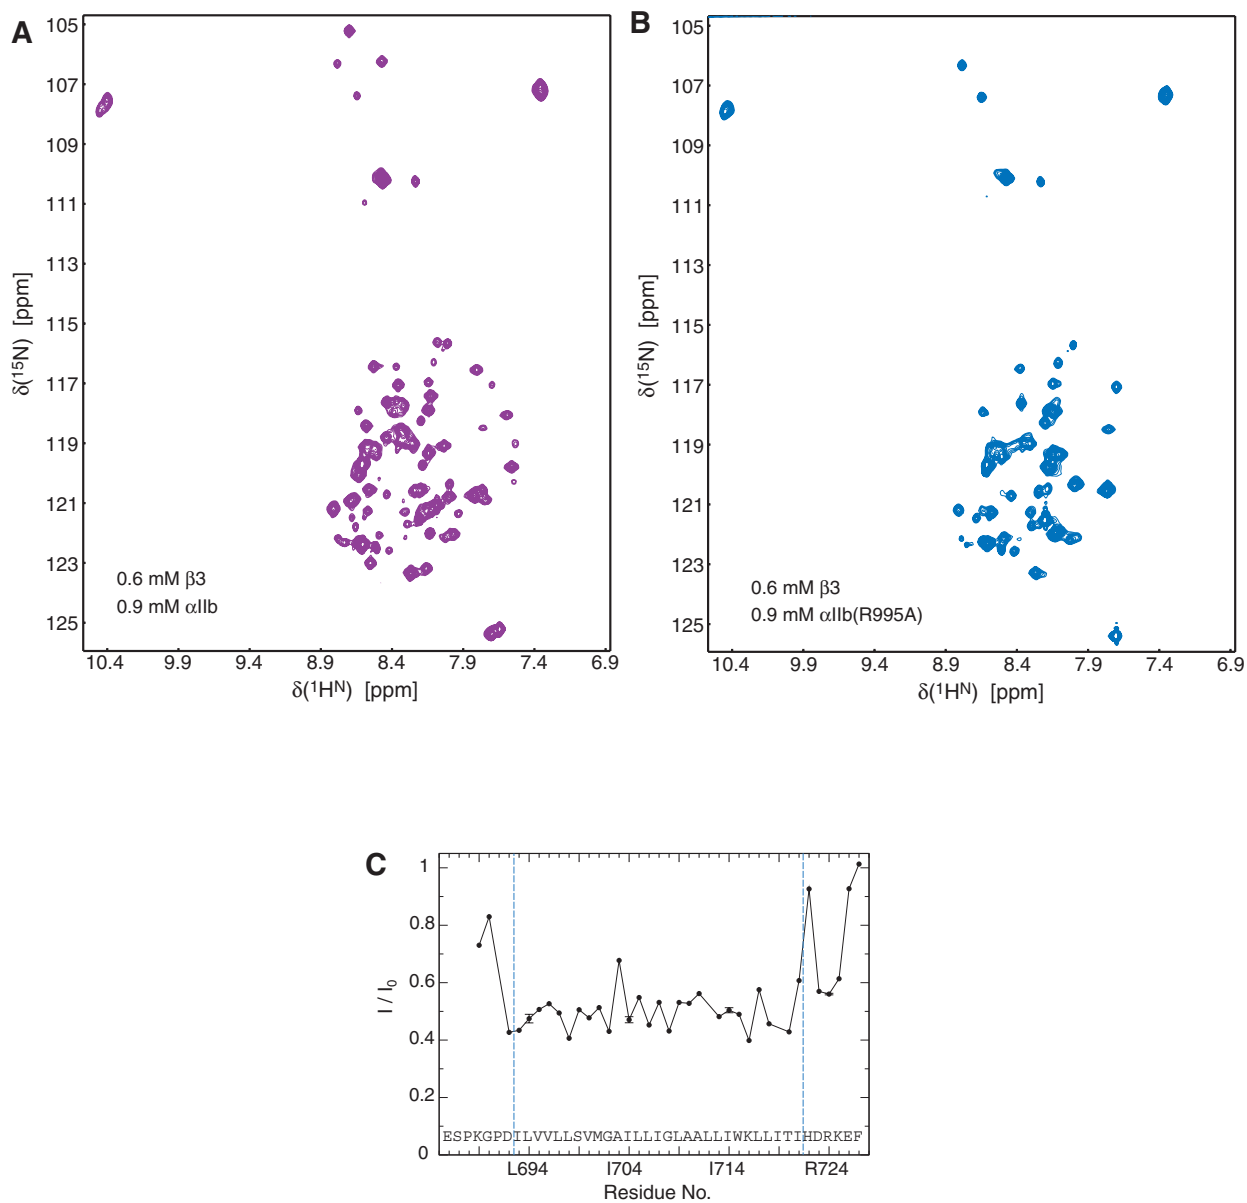

**Supplementary Figure 2. Effect of  $\alpha \text{Iib(R995A)}$  peptide upon heterodimerization.** (A-B) Upon introducing the  $\alpha \text{Iib(R995A)}$  substitution, the heterodimeric  $\beta 3$  backbone H-N resonances are either lost or greatly diminished compared to wild-type  $\alpha \text{Iib}$  at identical experimental conditions (385 mM 1,2-Dihexanoyl-*sn*-Glycero-3-Phosphocholine, 83 mM 1-Palmitoyl-2-Oleoyl-*sn*-Glycero-3-Phosphocholine, 41 mM 1-Palmitoyl-2-Oleoyl-*sn*-Glycero-3-[Phospho-L-Serine]). (C) However, the resonance intensities at their monomeric positions (Supplementary Figure 1B) are still affected by the presence of  $\alpha \text{Iib(R995A)}$  as depicted by the signal intensity ratios,  $I/I_0$ , of  $\beta 3$  in the presence and absence of  $\alpha \text{Iib(R995A)}$ , respectively. This indicates the presence of additional heterodimerization elements and, on the timescale of the NMR measurements, reflects a transition from the slow to the fast exchange limit. In other words, the  $\alpha \text{Iib(R995A)}$  weakens heterodimerization, but does not abrogate it completely in agreement with additional  $\alpha \text{Iib}$ - $\beta 3$  heterodimerization elements (see Figure 5).

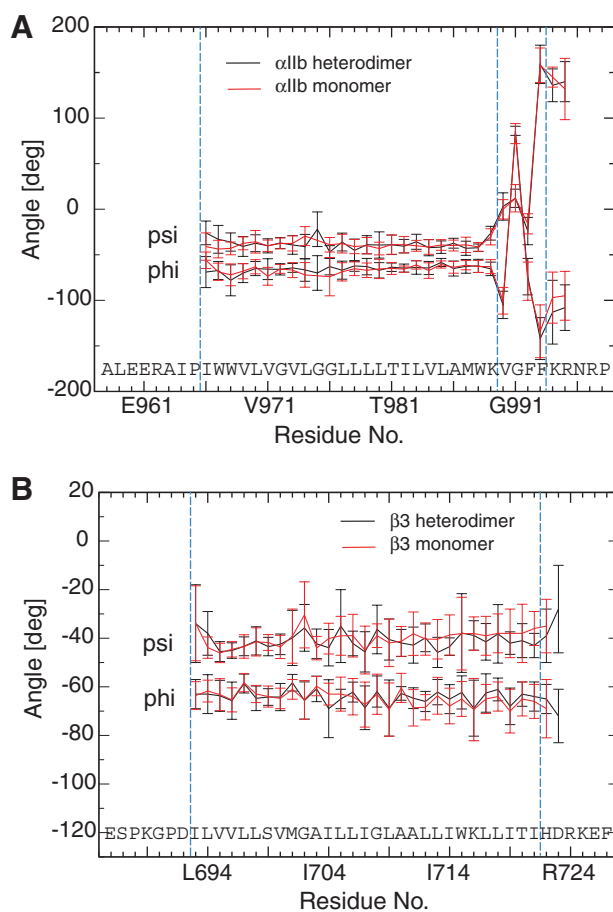

**Supplementary Figure 3. Comparison of chemical shift-based backbone torsion angle predictions between monomeric and heterodimeric states.** TALOS-based predictions using  $H^\alpha$ ,  $N$ ,  $C^\alpha$  and  $C'$  chemical shifts. Monomeric and heterodimeric backbone conformations are identical within prediction uncertainties.

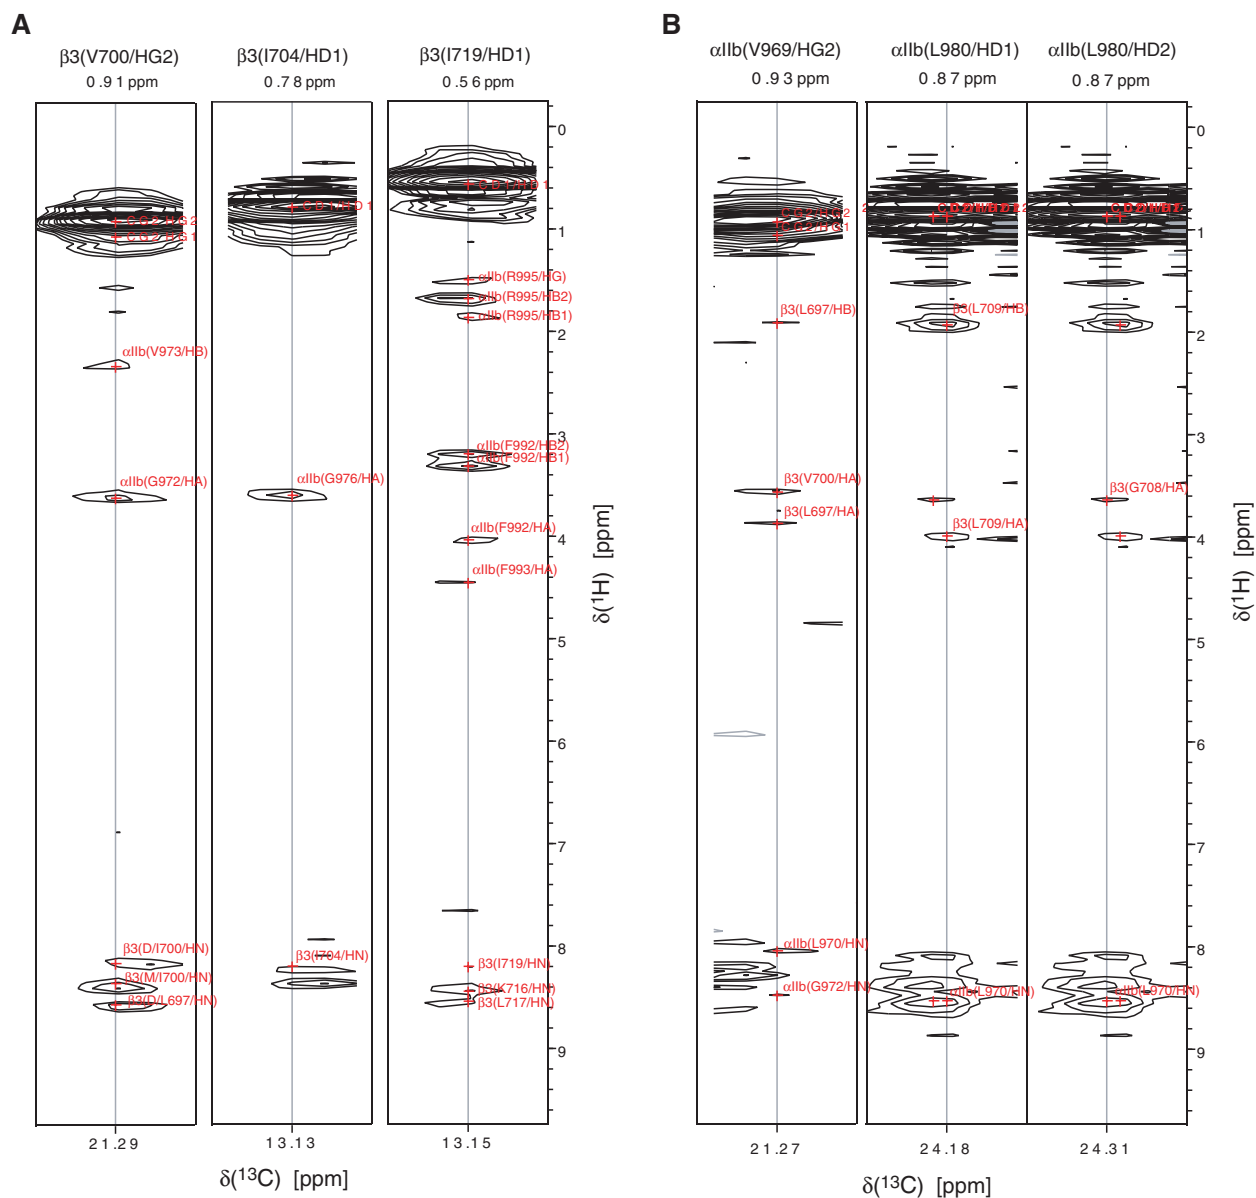

**Supplementary Figure 4. Illustration of  $\alpha IIb$ - $\beta 3$  intersubunit NOEs.** Representative strip plots of, (A), selectively Val- $\gamma^{1,2}$  ( $^{13}CH_3/^{12}CD_3$ ), Leu- $\delta^{1,2}$  ( $^{13}CH_3/^{12}CD_3$ ), Ile- $\delta^1$  ( $^{13}CH_3$ )-labeled  $\beta 3$  in combination with fully protonated  $\alpha IIb$  and, (B), selectively Val- $\gamma^{1,2}$  ( $^{13}CH_3/^{12}CD_3$ ), Leu- $\delta^{1,2}$  ( $^{13}CH_3/^{12}CD_3$ ), Ile- $\delta^1$  ( $^{13}CH_3$ )-labeled  $\alpha IIb$  in combination with fully protonated  $\beta 3$ . Intersubunit NOEs are indicated. Intersubunit methyl-methyl NOEs could not be identified due to the dominance of the intrasubunit methyl signal. Intersubunit methyl to  $H^\alpha$ ,  $H^\beta$  and  $H^\gamma$  NOEs were readily identifiable, as indicated. NOEs between methyl groups and back-exchanged  $H^N$  nuclei are also marked. NOE mixing times and exchange kinetics (temperature) were extensively screened to optimize the relatively weak transferred NOE amplitudes (fast exchange limit) and the ratio of associated to dissociated states (slow exchange limit) in the non-covalently associated complex.

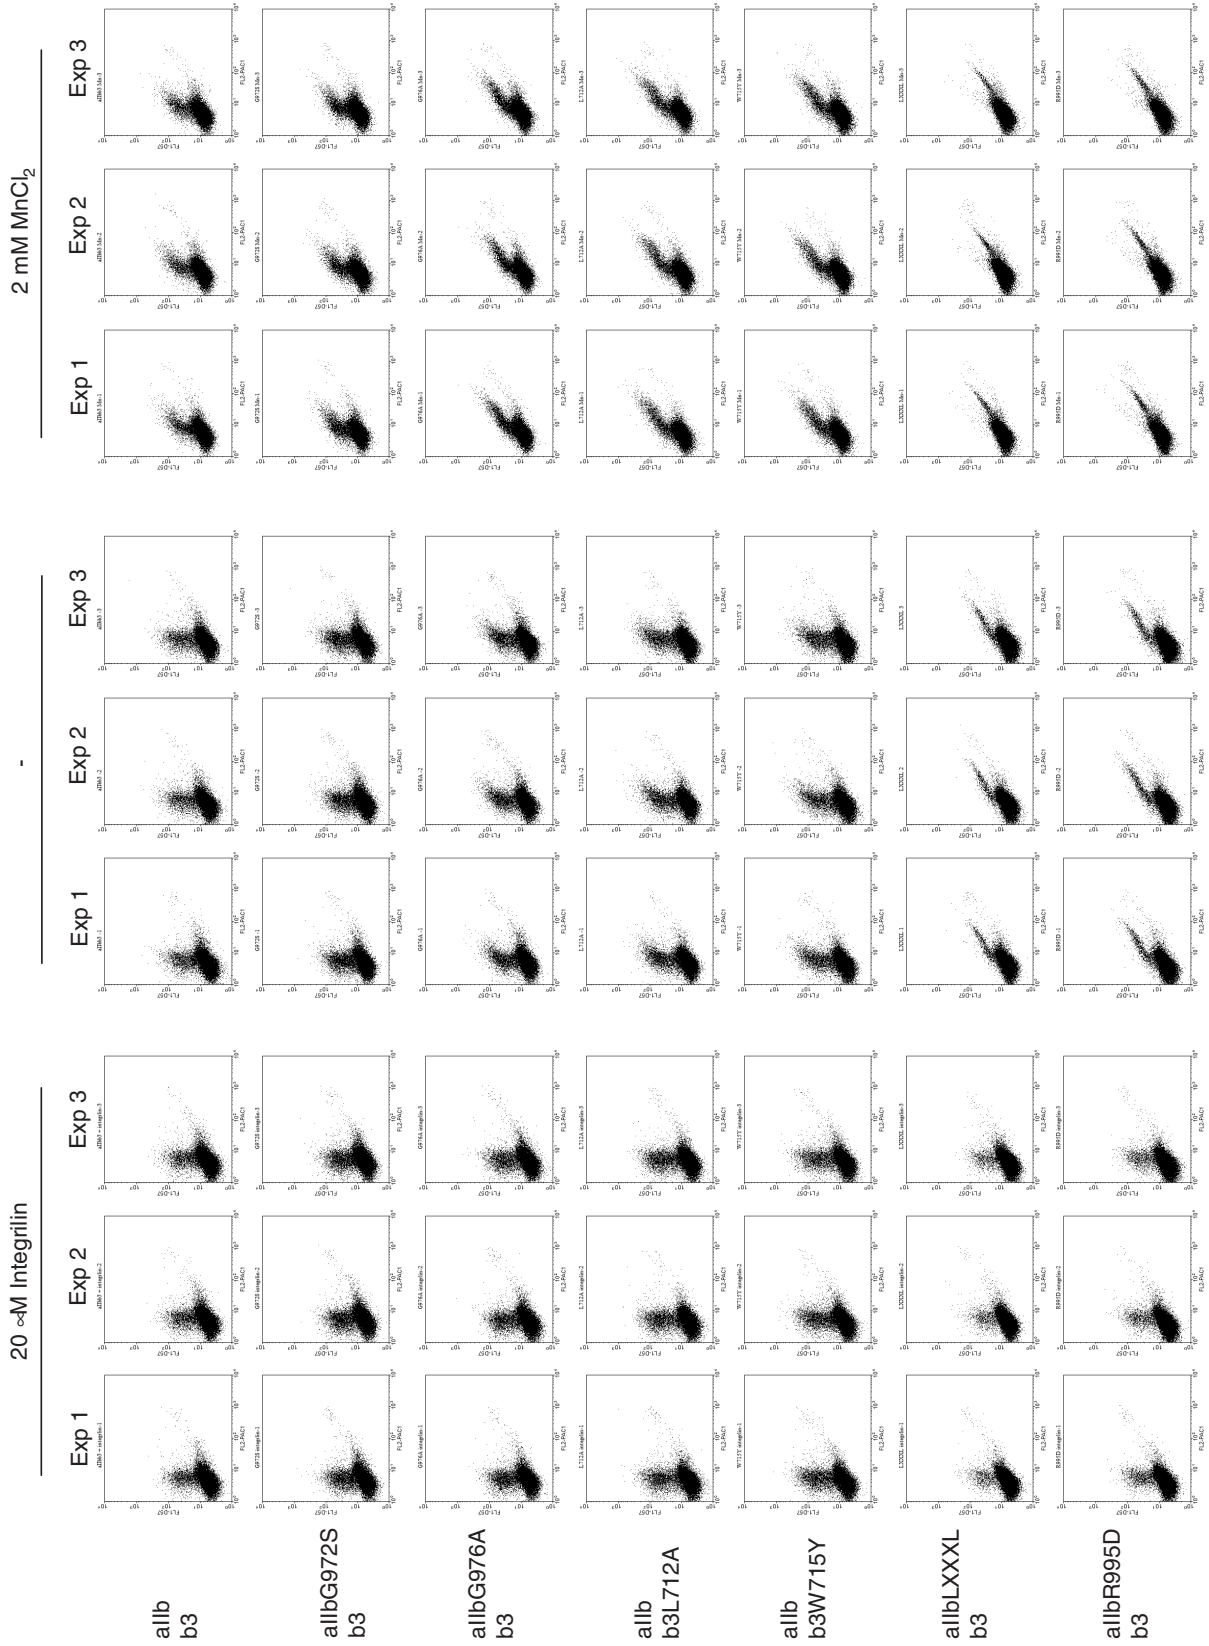

Supplementary Figure 5. Flow cytometric activation assays of selected point mutations (c.f. Figure 8).

**Supplementary Table I.** Compatibility of heterodimeric backbone torsion angle restraints and H<sup>N</sup>-H<sup>N</sup> NOEs with monomeric  $\alpha$ IIb and  $\beta$ 3 transmembrane structures<sup>a</sup>

---

|                                                                                               |                   |
|-----------------------------------------------------------------------------------------------|-------------------|
| R.m.s. deviations from experimental dihedral ( $\phi/\psi$ ) restraints (deg)                 |                   |
| All (121)                                                                                     | 1.03 <sup>b</sup> |
| R.m.s. deviations from experimental distance (H <sup>N</sup> -H <sup>N</sup> ) restraints (Å) |                   |
| All (100)                                                                                     | 0.08              |
| Interresidue sequential ( $ i - j  = 1$ ) (50)                                                | 0.06 <sup>c</sup> |
| Interresidue short range ( $1 <  i - j  < 5$ ) (50)                                           | 0.11 <sup>c</sup> |

---

a, PDB ID 2k1a and 2mrz, average structures

b, The r.m.s.d. upon refining directly against these restraints is comparable (see Supplementary Table II).

c, The r.m.s.d. upon refining directly against these restraints is only marginally lower (see Supplementary Table II).

**Supplementary Table II.** Structural statistics for the  $\alpha$ IIb- $\beta$ 3 transmembrane complex<sup>a</sup>

---

|                                                                     |               |
|---------------------------------------------------------------------|---------------|
| R.m.s. deviations from experimental dihedral restraints (deg)       |               |
| All (145) <sup>b</sup>                                              | 1.28 ± 0.14   |
| R.m.s. deviations from experimental distance restraints (Å)         |               |
| All (127)                                                           | 0.04 ± 0.01   |
| Interresidue sequential ( i - j  = 1) (50)                          | 0.01 ± 0.01   |
| Interresidue short range (1 <  i - j  < 5) (50)                     | 0.05 ± 0.01   |
| Interresidue long range ( i - j  ≥ 5) (27)                          | 0.06 ± 0.02   |
| Deviations from idealized covalent geometry                         |               |
| Bonds (Å)                                                           | 0.003 ± 0.000 |
| Angles (deg)                                                        | 0.495 ± 0.018 |
| Impropers (deg)                                                     | 0.326 ± 0.020 |
| Coordinate precision (Å) <sup>c</sup>                               |               |
| Backbone non-hydrogen atoms                                         | 0.68          |
| All non-hydrogen atoms                                              | 1.05          |
| Measures of structural quality                                      |               |
| E <sub>LJ</sub> (kcal·mol <sup>-1</sup> ) <sup>3 d</sup>            | -295.9        |
| Residues in most favorable region of Ramachandran plot <sup>e</sup> | 100%          |

---

a, Statistics for the 20 calculated simulated annealing structures, encompassing residues  $\alpha$ IIb(I966-R995) and  $\beta$ 3(I693-D723).

b, Torsion angles included 121  $\phi/\psi$  and 24  $\chi_{1-4}$  angle restraints.  $\chi_{1-4}$  restraints set snorkeling/rotamer preferences.

c, Defined as the average r.m.s. difference between the final 20 simulated annealing structures and the mean coordinates.

d, The Lennard–Jones van der Waals energy was calculated with the CHARMM PARAM 19/20 parameters and was not included in the simulated annealing target function.

e, PROCHECK V3.4.4 (Roman A. Laskowski, Malcolm W. MacArthur, David S. Moss and Janet M. Thornton (1993). PROCHECK: a program to check the stereochemical quality of protein structures. J. Appl. Cryst., 26, 283-291)
